# Supplementary material
Source: Springer Nature journal article supplement (https://www.springermedizin.de/resource/supplementary/12879_2010_1351_MOESM1_ESM.pdf/9443214)
Supplement: MOESM1 [file 9443214]

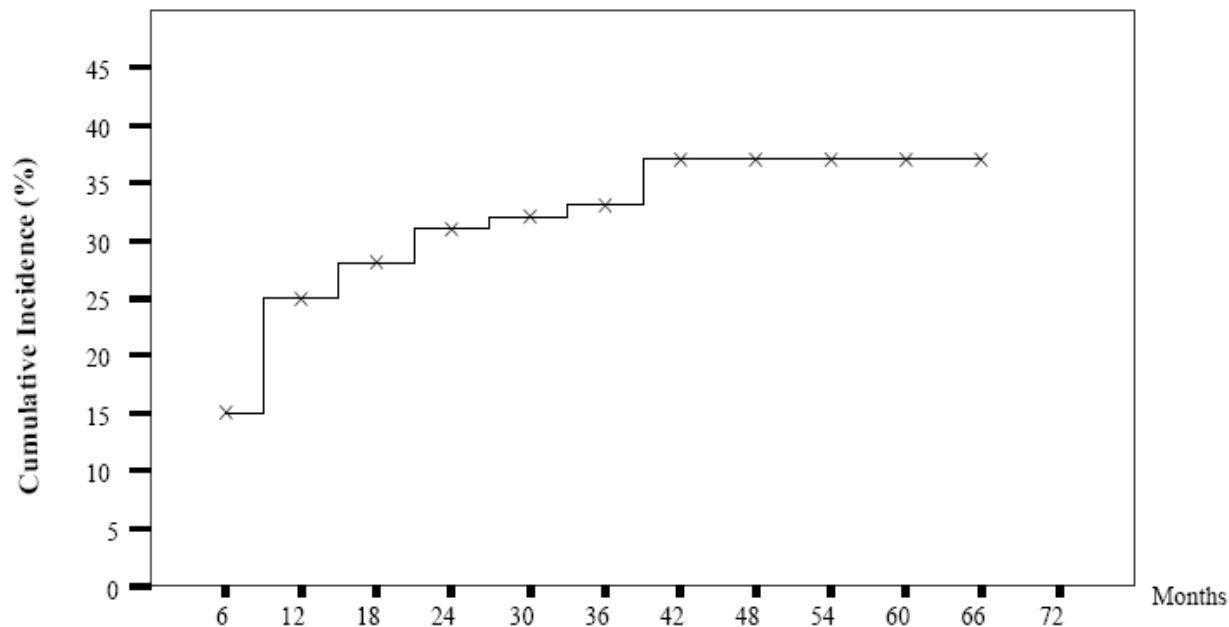

Number of ASCUS+

56    25    6    4    1    1    2    0    0    0    0

Follow-up cases

444    255    153    106    83    67    45    23    16    5    2

ASCUS+, atypical squamous cell of undetermined significance or higher grades
